# Supplementary material
Source: PubMed Central journal article supplement (PMC6030517)
Supplement: rspb20180541supp1.pdf [file rspb20180541supp1.pdf]

**Electronic Supplementary Material 1. Ethogram.**

---

| Behaviour                         | Description                                                                                                                           |
|-----------------------------------|---------------------------------------------------------------------------------------------------------------------------------------|
| <b>Mother-Infant Interactions</b> |                                                                                                                                       |
| Active reject                     | Mother prevents the infant from making ventral contact by holding or pushing the infant away from her body                            |
| Passive reject                    | Mother prevents the infant from making ventral contact by blocking her chest with arm/object or by rotating body away from the infant |
| Restrain                          | Mother prevent the infant from breaking contact by pulling on the leg or tail of the infant                                           |
| Retrieve                          | Mother manually collects the infant                                                                                                   |
| Abuse                             | Mother bites, drags, or stomps on the infant                                                                                          |
| Groom                             | Mother combs or picks through the fur of the infant                                                                                   |
| Contact-initiate, mother          | Mother makes any physical contact with the infant lasting more than 5 seconds                                                         |
| Contact-break, mother             | Mother stops physical contact with the infant                                                                                         |
| Proximity-initiate, mother        | Mother moves within an arm's length radius from the infant                                                                            |
| Proximity-break, mother           | Mother moves outside of an arm's length radius from the infant                                                                        |
| Mother follow infant              | Mother moves uninterrupted, unimpeded in the direction of the infant                                                                  |
| Suckle                            | Infant makes oral contact with nipple of the mother                                                                                   |
| Contact-initiate, infant          | Infant makes any physical contact with the mother lasting more than 5 seconds                                                         |
| Contact-break, infant             | Infant stops physical contact with the mother                                                                                         |
| Proximity-initiate, infant        | Infant moves within an arm's length radius from the mother                                                                            |
| Proximity-break, infant           | Infant moves outside of an arm's length radius from the mother                                                                        |
| Infant follow mother              | Infant moves uninterrupted, unimpeded in the direction of the mother                                                                  |

---

**Electronic Supplementary Material 2. Distribution of 5-HTTLPR genotypes.**

| <b>5-HTTLPR:</b> |            |            |            |
|------------------|------------|------------|------------|
| <b>Sex:</b>      | <b>l/l</b> | <b>l/s</b> | <b>s/s</b> |
| Female           | 8          | 11         | 0          |
| Male             | 12         | 9          | 2          |
